# Supplementary material
Source: PubMed Central journal article supplement (PMC2996665)
Supplement: 1014399107_Appendix.pdf [file 1014399107_Appendix.pdf]

## Supporting Information (SI)

Table 1. Carbonate contents and isotopic composition of the aerosol samples collected at four different sites: Mount Soledad (MSD); Chemistry Building at Univ. of California San Diego (BCH); Scripps Institute of Oceanography Research Pier (SIO), La Jolla, California and White Mountain Research Station (WMRS), California, USA. Here sample names ending in A denotes coarse fraction ( $> 1\mu\text{m}$ ) and B denotes fine fraction ( $< 1.0\mu\text{m}$ ). Collection date is expressed as dd-mm-yy. Standard deviations in the table are  $1\sigma$  SD for replicate mass spectrometric analysis. Overall reproducibility for acid digestion, flourination and gas chromatography with laboratory standards ( $n = 5$ ) is  $\pm 0.3\text{‰}$  for  $^{17}\text{O}$ ,  $^{18}\text{O}$  and  $\pm 0.1\text{‰}$  for  $\Delta^{17}\text{O}$ . Here  $\delta^i\text{O}' = 10^3 \ln(1 + \delta^i\text{O}/10^3)$  with  $^i\text{O} = ^{17}\text{O}$ ,  $^{18}\text{O}$  and  $\Delta^{17}\text{O} = \delta^{17}\text{O}' - 0.524 \delta^{18}\text{O}'$

| Sample      | $\text{CO}_3^{-2}$<br>( $\mu\text{g}/\text{cm}^{-3}$ ) | $\delta^{17}\text{O}'$<br>( $\text{‰}$ ) | $\delta^{18}\text{O}'$<br>( $\text{‰}$ ) | $\Delta^{17}\text{O}$<br>( $\text{‰}$ ) |
|-------------|--------------------------------------------------------|------------------------------------------|------------------------------------------|-----------------------------------------|
| MSD160107A  | 3.92                                                   | $16.57 \pm 0.04$                         | $24.95 \pm 0.05$                         | 3.49                                    |
| MSD160107B  | 1.49                                                   | $18.14 \pm 0.03$                         | $30.66 \pm 0.02$                         | 2.07                                    |
| BCH151106A  | 3.40                                                   | $12.79 \pm 0.05$                         | $18.78 \pm 0.02$                         | 2.95                                    |
| BCH151106B  | 2.46                                                   | $16.18 \pm 0.07$                         | $25.28 \pm 0.03$                         | 2.93                                    |
| SIO270407A  | 2.37                                                   | $17.43 \pm 0.06$                         | $31.62 \pm 0.04$                         | 0.86                                    |
| SIO270407B  | 1.20                                                   | $8.16 \pm 0.05$                          | $14.29 \pm 0.02$                         | 0.67                                    |
| SIO250507A  | 6.47                                                   | $15.85 \pm 0.03$                         | $24.19 \pm 0.03$                         | 3.16                                    |
| SIO250507B  | 1.03                                                   | $10.02 \pm 0.05$                         | $17.41 \pm 0.04$                         | 0.90                                    |
| SIO260607A  | 2.82                                                   | $16.53 \pm 0.06$                         | $24.15 \pm 0.03$                         | 3.87                                    |
| SIO260607B  | 1.08                                                   | $7.41 \pm 0.02$                          | $12.92 \pm 0.04$                         | 0.64                                    |
| SIO160207B  | 4.38                                                   | $14.58 \pm 0.05$                         | $25.90 \pm 0.02$                         | 1.01                                    |
| SIO200407B  | 2.06                                                   | $12.50 \pm 0.06$                         | $23.18 \pm 0.03$                         | 0.36                                    |
| SIO040507A  | 2.11                                                   | $13.64 \pm 0.04$                         | $22.36 \pm 0.03$                         | 1.92                                    |
| SIO230307A  | 1.83                                                   | $9.94 \pm 0.03$                          | $17.53 \pm 0.02$                         | 0.75                                    |
| WMRS080807A | 3.55                                                   | $12.89 \pm 0.04$                         | $23.01 \pm 0.02$                         | 0.83                                    |
| WMRS080807B | 2.93                                                   | $13.44 \pm 0.05$                         | $24.59 \pm 0.03$                         | 0.55                                    |

Table 2. Carbonate contents and isotopic composition of various soil samples. Here  $\delta^i\text{O}' = 10^3 \ln(1 + \delta^i\text{O}/10^3)$  with  $^i\text{O} = ^{17}\text{O}, ^{18}\text{O}$  and  $\Delta^{17}\text{O}^* = \delta^{17}\text{O}' - 0.524 \delta^{18}\text{O}'$

| Sample                           | $\text{CO}_3^{-2}$<br>(%) | $\delta^{17}\text{O}'$<br>(‰) | $\delta^{18}\text{O}'$<br>(‰) | $\Delta^{17}\text{O}^*$<br>(‰) |
|----------------------------------|---------------------------|-------------------------------|-------------------------------|--------------------------------|
| Arizona Test Dust                | 2.98                      | $15.10 \pm 0.03$              | $29.05 \pm 0.02$              | -0.12                          |
| Owen Lake Dust                   | 3.04                      | $18.15 \pm 0.03$              | $34.98 \pm 0.03$              | -0.18                          |
| Black Rock Desert<br>Dust Nevada | 4.21                      | $17.97 \pm 0.04$              | $34.65 \pm 0.02$              | -0.18                          |
| YaDan GanSu China                | 4.42                      | $16.38 \pm 0.02$              | $31.71 \pm 0.01$              | -0.23                          |
| Grand Canyon Red<br>Soil         | 0.03                      | $20.97 \pm 0.03$              | $40.24 \pm 0.02$              | -0.11                          |
| Commercial cement<br>sample      | 3.06                      | $14.38 \pm 0.04$              | $27.67 \pm 0.03$              | -0.11                          |

Table 3. Enrichment in  $\text{CO}_2$  produced after acid digestion of  $\text{CaCO}_3$  ( $3.2 \pm 0.02$  mg) that has been reacted with  $\text{O}_3$  in the presence of thin water film.

| Sample   | Reaction<br>time (min) | $\text{H}_2\text{O}$<br>( $\mu\text{mole}$ ) | $\text{O}_3$<br>( $\mu\text{mole}$ ) | $\delta^{17}\text{O}'$<br>(‰) | $\delta^{18}\text{O}'$<br>(‰) | $\Delta^{17}\text{O}^*$<br>(‰) |
|----------|------------------------|----------------------------------------------|--------------------------------------|-------------------------------|-------------------------------|--------------------------------|
| *R3P3-C1 | 0.0                    | 55.5                                         | 0                                    | $17.82 \pm 0.15$              | $34.12 \pm 0.08$              | -0.05                          |
| *R3P58   | 30                     | 55.5                                         | 27                                   | $20.86 \pm 0.03$              | $36.49 \pm 0.02$              | 1.73                           |
| *R3P61   | 60                     | 55.5                                         | 27                                   | $22.28 \pm 0.04$              | $37.90 \pm 0.03$              | 2.42                           |
| *R3P60   | 1320                   | 55.5                                         | 27                                   | $23.36 \pm 0.1$               | $39.15 \pm 0.03$              | 2.84                           |
| **R6P33  | 30                     | 55.5                                         | 0                                    | $6.76 \pm 0.02$               | $13.03 \pm 0.02$              | -0.06                          |
| **R3P42  | 30                     | 55.5                                         | 25                                   | $9.84 \pm 0.02$               | $16.49 \pm 0.03$              | 1.19                           |
| **R3P47  | 30                     | 55.5                                         | 50                                   | $12.21 \pm 0.05$              | $19.48 \pm 0.03$              | 2.00                           |

$\text{O}_3$  concentration varied by  $\pm 2 \mu\text{moles}$

\* $\text{CaCO}_3$  powder derived from oolite (R. Clayton's lab).

\*\* AR grade calcite powder obtained from Solvey.

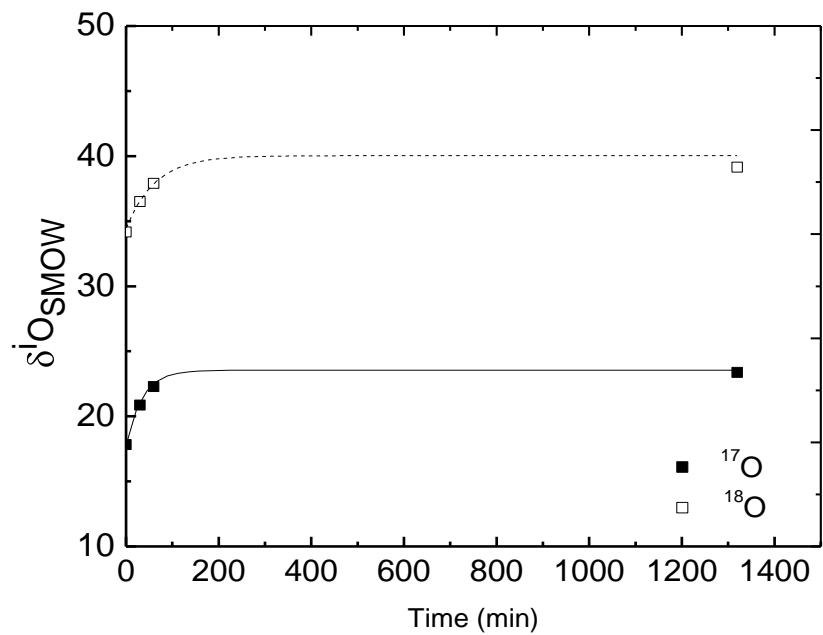

Fig. S1a. Kinetics of oxygen isotope enrichment in laboratory carbonates ( $^{17}\text{O}$  and  $^{18}\text{O}$ ).  $\text{CaCO}_3$  ( $3.2 \pm 0.02$  mg) in the presence of ozone ( $27 \pm 2$   $\mu\text{mole}$  with mean  $\delta^{17}\text{O}' = 53 \pm 2$  and  $\delta^{18}\text{O}' = 50 \pm 2$  ‰) and Millipore water ( $55.5 \pm 0.5$   $\mu\text{moles}$ ).

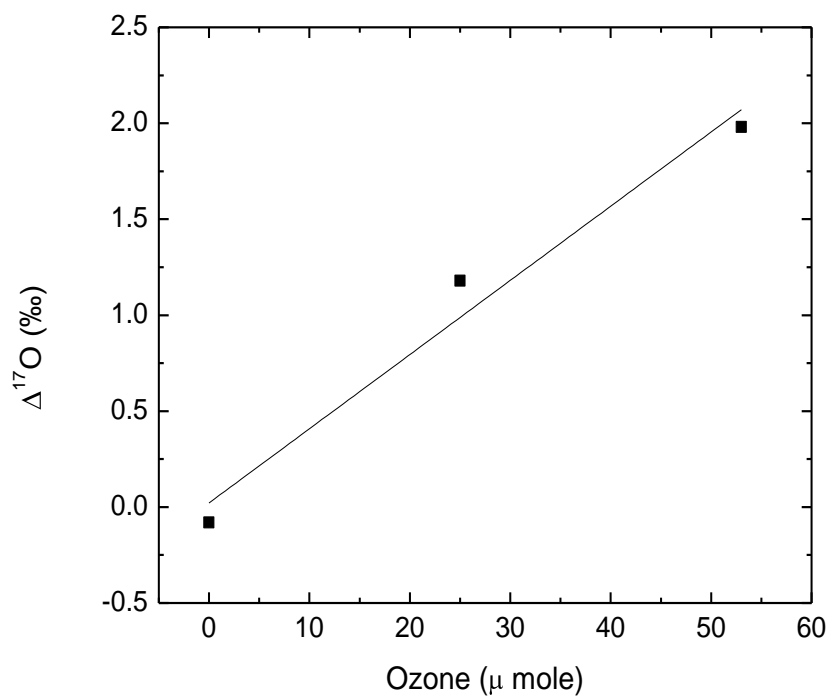

Fig. S1b. Anomalous oxygen isotopic enrichment in  $\text{CO}_2$  produced from calcium carbonate after reaction with varying concentration of ozone for 30 minutes under following experimental conditions.  $\text{CaCO}_3$  ( $3.2 \pm 0.02$  mg), ozone ( $0, 25 \pm 2, 50 \pm 2$   $\mu$ mole with mean  $\delta^{17}\text{O}' = 53 \pm 2$  and  $\delta^{18}\text{O}' = 50 \pm 2$  ‰) and Milli pore water ( $55.5 \pm 0.5$   $\mu$ moles).
